# Supplementary material for: Enrichment and analysis of peptide subsets using fluorous affinity tags and mass spectrometry
Source: Springer Nature journal article supplement (doi:10.1038/nbt1076), 2005-03-14
Supplement: nbt1076-S7.pdf [file nbt1076-S7.pdf]

## Brittain *et al.* Supplementary Table 2

| MSDB       | $\beta$ -Eliminated Sequence   | MSDB       | $\beta$ -Eliminated Sequence                       |
|------------|--------------------------------|------------|----------------------------------------------------|
| JC4928     | AGGSAALsPSK                    | Q9C012     | LQELtR                                             |
| HSHUB1     | QVHPDTGIsSK                    | CAC22102   | LSSSGtEVK                                          |
| Q8N9C4     | TAsFSESR                       | Q96FZ6     | LsDGVAVLK                                          |
| Q9BYG9     | TVsLGAGAK                      | AAB37272   | ASAsPR                                             |
| AAD32454   | SsLVTSK                        | A57198     | YFQsPsR                                            |
| HSHU11     | GTGASG <sub>s</sub> FK         | Q96IF9     | GFGsFR                                             |
| G3P1_HUMAN | EAsEGPLK                       | Q96JE9     | AtGPAPGPTGER                                       |
| HSHUB1     | EIQtAVR                        | Q96K76     | AESVAAPItVR                                        |
| I38346     | ISsLR                          | AAH06997   | SSsPAPADIAQTVQEDLR                                 |
| EF2_HUMAN  | FtDTR                          | HFC1_HUMAN | VMsVVQTKPVQTS <sub>s</sub> AVTGQASTGPVTQIIQTK      |
| Q8IWIY9    | TKPsR                          | DEHUG3     | VIIsAPSADAPMFVMGVNHEK                              |
| Q9H825     | ESsWDHVK                       | DEHUG3     | VPTANVsVVDLTCR                                     |
| HS9B_HUMAN | LGIHEDsTNR                     | HHHU84     | GVVDsEDLPLNLSR                                     |
| AAF17197   | SNsVEKPVSILSR                  | Q8IWS7     | ATNEsEDEIPQLVPIGK                                  |
| Q96SM2     | THSTsSSLGSGESPF <sub>s</sub> R | STN1_HUMAN | AsGQAFELILSPR                                      |
| A46711     | ADEGI <sub>s</sub> FR          | Q8IWR2     | AILVDLEPGTMDsVR                                    |
| TPHUN1     | VVGGsLR                        | Q8NG67     | LGsSGLGSASSIQA <sub>s</sub> AVR                    |
| PWHUA      | VLsIGDGIAR                     | Q96RS2     | AIVAIENPADVSVISsR                                  |
| HSHU1B     | AsGPPVSELITK                   | S66681     | GSsFHR                                             |
| Q9BQ53     | TFsATVR                        | Q8WX38     | TLsMIEEEIR                                         |
| ATHU       | EITALAPsTMK                    | Q9BT86     | IIsHFGAAR                                          |
| H3B_HUMAN  | StELLIR                        | DEHUG3     | GALQNIIPAsTGA <sub>s</sub> AK                      |
| AAB86742   | GITLsVR                        | S25854     | VPLAPITDPQQLQLsPLK                                 |
| I52726     | KPLTSSsAAPQRPISTQR             | HSHUB1     | AMGIMNsFVNDIFER                                    |
| MRP_HUMAN  | LSGLsFK                        | Q9BT19     | MSVQPTVsLGGFEITPPVVLR                              |
| Q92608     | SsVVFADEK                      | S43363     | IIPTLEEGLQLPsPTATSQLPLESDAVECLNYQH <sub>s</sub> YK |
| Q8N887     | LsEEPR                         | HSHUA1     | VtIAQGGVLPNIQAVLLPK                                |
| I38612     | EFQTsAISR                      | VIME_HUMAN | ISLPLPNFsSLNLR                                     |
| DEHUG3     | GALQNIIPAsTGA <sub>s</sub> AK  | STN1_HUMAN | ASGQAFELILsPR                                      |
| DEHUPA     | YHGHSMSDPGVsYR                 |            |                                                    |

**Supplementary Table 2.** Peptide sequences with candidate phosphorylation sites identified from fluorouracil affinity tag enrichment of  $\beta$ -eliminated species from Jurkat T cell total protein extract. ‘s’, candidate modified serine residue; ‘t’, candidate modified threonine residue; \* previously identified candidate phosphorylation site (Phosphobase v2.0, [www.cbs.dtu.dk/databases/PhosphoBase/](http://www.cbs.dtu.dk/databases/PhosphoBase/)).
